# Supplementary material
Source: publisher site journal article supplement (https://www.dovepress.com/article/337644)
Supplement: Supplementary file 1 [file get_supplementary_file.php]

# Supplement

**Supplementary Table 1 Item response rates as %, moderate and severe responses combined for the 11 items with the highest response rates**

| Item no. | Description                              | Severity score | Change score | Mean |
|----------|------------------------------------------|----------------|--------------|------|
| 1        | Appearance of purulent/thick sputum      | 59             | 59           | 59   |
| 3        | Worsening of cough                       | 69             | 61           | 65   |
| 5        | Hard to cough out sputum                 | 51             | 46           | 49   |
| 7        | Colour of sputum changes                 | 35             | 42           | 39   |
| 8        | Increased volume of sputum               | 60             | 58           | 59   |
| 9        | Abnormal sound during breathing/wheezing | 52             | 45           | 49   |
| 10       | Laboured breathing                       | 63             | 59           | 61   |
| 11       | Shortness of breath                      | 64             | 59           | 62   |
| 12       | Chest distress                           | 49             | 45           | 47   |
| 13       | Limitation of activity                   | 58             | 54           | 56   |
| 15       | Exhaustion & fatigue                     | 49             | 49           | 49   |

Supplementary Table 2 **Sensitivity and specificity using any 1 or more CERT item that scored moderate or severe**

| At least 1 positive CERT out of 5 | 'Exacerbating' | 'Not exacerbating' | Total |
|-----------------------------------|----------------|--------------------|-------|
| CERT exacerbator                  | 133            | 6                  | 139   |
| CERT non-exacerbator              | 1              | 13                 | 11    |
| Total                             | 134            | 16                 | 150   |

**Notes:**

Sensitivity 99.3, specificity 62.5%, kappa value 0.7161.

The heading 'Exacerbating' refers to patients with any 2 or more item combinations (out of the 10 final items) that scored moderate or severe in response to the severity of symptoms during an exacerbation.

**Supplementary Table 3** Sensitivity and specificity using any 2 or more CERT items that scored moderate or severe

| CERT positive, at least 2 out of 5 | 'Exacerbating' | 'Not exacerbating' | Total |
|------------------------------------|----------------|--------------------|-------|
| CERT exacerbator                   | 123            | 0                  | 123   |
| CERT non-exacerbator               | 1              | 16                 | 27    |
| Total                              | 134            | 16                 | 150   |

**Notes:**

Sensitivity 91.8, specificity 100%, kappa value 0.7046.

The heading 'Exacerbating' refers to patients with any 2 or more item combinations (out of the 10 final items) that scored moderate or severe in response to the severity of symptoms during an exacerbation.

**Supplementary Table 4** Sensitivity and specificity using any 1 or more CERT item that scored moderate or severe

| CERT positive, at least 1 out of 5 | 'Exacerbating' | 'Not exacerbating' | Total |
|------------------------------------|----------------|--------------------|-------|
| CERT exacerbator                   | 121            | 18                 | 139   |
| CERT non-exacerbator               | 1              | 10                 | 11    |
| Total                              | 122            | 28                 | 150   |

**Notes:**

Sensitivity 99.2, specificity 36.0%, kappa value 0.4712.

The heading 'Exacerbating' refers to patients with any 3 or more item combinations (out of the 10 final items) that scored moderate or severe in response to the severity of symptoms during an exacerbation.

**Supplementary Table 5** Sensitivity and specificity using any 2 or more CERT items that scored moderate or severe

| CERT positive, at least 2 out of 5 | 'Exacerbating' | 'Not exacerbating' | Total |
|------------------------------------|----------------|--------------------|-------|
| CERT exacerbator                   | 120            | 3                  | 123   |
| CERT non-exacerbator               | 2              | 25                 | 27    |
| Total                              | 122            | 28                 | 150   |

**Notes:**

Sensitivity 98.4, specificity 89.3%, kappa value 0.8645.

The heading 'Exacerbating' refers to patients with any 3 or more item combinations (out of the 10 final items) that scored moderate or severe in response to the severity of symptoms during an exacerbation.

**Supplementary Material: GlaxoSmithKline plc.-sponsored international advisory board**

Scientific collaboration between GlaxoSmithKline plc. and diverse groups of experts (academia, industry, regulators, public health authorities, etc) is necessary to advance key medical/scientific discussions and to contribute and share GlaxoSmithKline plc.'s broad scientific knowledge and experience in various settings. GlaxoSmithKline plc.'s scientific engagement activities are entirely non-promotional and are designed to, in no way, influence the prescription, supply, sale, or use of their medicines. Any materials used (eg, slides, invitations, etc) are approved as non-promotional in the market in which the activity occurs and presentation of data is limited to that necessary to enable the discussion.

**Supplementary Figure S1** The CERT for use by Chinese patients, including pictograms, and an English translation

## 慢性阻塞性肺疾病急性加重识别卡

此卡可帮助您评估目前是否处于慢阻肺急性加重，请根据实际情况打“✓”

|                                                                                           |                                                                                           |                                                                                                  |                                                                                            |                                                                                             |
|-------------------------------------------------------------------------------------------|-------------------------------------------------------------------------------------------|--------------------------------------------------------------------------------------------------|--------------------------------------------------------------------------------------------|---------------------------------------------------------------------------------------------|
| <br>咳嗽加重 | <br>痰量增加 | <br>感觉吸进去的空气不够用 | <br>喘气费力 | <br>活动受限 |
| 与平时一样 <input type="radio"/>                                                               | 与平时一样 <input type="radio"/>                                                               | 与平时一样 <input type="radio"/>                                                                      | 与平时一样 <input type="radio"/>                                                                | 与平时一样 <input type="radio"/>                                                                 |
| 轻微 <input type="radio"/>                                                                  | 轻微 <input type="radio"/>                                                                  | 轻微 <input type="radio"/>                                                                         | 轻微 <input type="radio"/>                                                                   | 轻微 <input type="radio"/>                                                                    |
| 中度 <input type="radio"/>                                                                  | 中度 <input type="radio"/>                                                                  | 中度 <input type="radio"/>                                                                         | 中度 <input type="radio"/>                                                                   | 中度 <input type="radio"/>                                                                    |
| 严重 <input type="radio"/>                                                                  | 严重 <input type="radio"/>                                                                  | 严重 <input type="radio"/>                                                                         | 严重 <input type="radio"/>                                                                   | 严重 <input type="radio"/>                                                                    |

红色区域内您勾选2个以上的 ✓，提示您可能处于慢阻肺急性加重期，建议您至医院门急诊进一步就医。

年 月 日

Tick ✓ the most accurate description for you today compared with your usual state

|                                                                                                        |                                                                                                                   |                                                                                                            |                                                                                                            |                                                                                                                 |
|--------------------------------------------------------------------------------------------------------|-------------------------------------------------------------------------------------------------------------------|------------------------------------------------------------------------------------------------------------|------------------------------------------------------------------------------------------------------------|-----------------------------------------------------------------------------------------------------------------|
| <br>Worsening cough | <br>Increased volume of sputum | <br>Shortness of breath | <br>Laboured breathing | <br>Limitation of activity |
| As usual <input type="radio"/>                                                                         | As usual <input type="radio"/>                                                                                    | As usual <input type="radio"/>                                                                             | As usual <input type="radio"/>                                                                             | As usual <input type="radio"/>                                                                                  |
| Mild <input type="radio"/>                                                                             | Mild <input type="radio"/>                                                                                        | Mild <input type="radio"/>                                                                                 | Mild <input type="radio"/>                                                                                 | Mild <input type="radio"/>                                                                                      |
| Moderate <input type="radio"/>                                                                         | Moderate <input type="radio"/>                                                                                    | Moderate <input type="radio"/>                                                                             | Moderate <input type="radio"/>                                                                             | Moderate <input type="radio"/>                                                                                  |
| Severe <input type="radio"/>                                                                           | Severe <input type="radio"/>                                                                                      | Severe <input type="radio"/>                                                                               | Severe <input type="radio"/>                                                                               | Severe <input type="radio"/>                                                                                    |

If you choose at least 2 items in red you are probably experiencing a COPD exacerbation, and should visit your doctor
